# Supplementary material
Source: PubMed Central journal article supplement (PMC2815724)
Supplement: djp473_1.pdf [file djp473_1.pdf]

Supplementary Table 1. Germline mutations identified in *MSH6* by country of probands, the number of families found to carry each mutation, the nucleotide change, the predicted protein change and the mutation type\*

| Country of recruitment (No. of families) | No. of families with mutation | <i>MSH6</i> DNA change       | <i>MSH6</i> mutation in protein | Mutation type       |
|------------------------------------------|-------------------------------|------------------------------|---------------------------------|---------------------|
| Netherlands (5)<br>USA (1)               | 6                             | c.651_652insT                | p.K218fs                        | Frameshift          |
| USA (1)<br>Scotland (2)<br>Australia (2) | 5                             | c.3261insC                   | p.F1088fs                       | Frameshift          |
| Netherlands (4)                          | 4                             | c.1784delT                   | p.L595fs                        | Frameshift          |
| USA (2)<br>Netherlands (2)               | 4                             | c.3261delC                   | p.F1088fs                       | Frameshift          |
| USA (3)<br>Netherlands (1)               | 4                             | c.467C>G                     | p.S156X                         | Protein truncation  |
| USA (1)<br>Australia (2)                 | 3                             | c.3939_3957dup19             | p.A1320fs                       | Frameshift          |
| Scotland (3)                             | 3                             | c.3939_3958dup19             | p.A1320fs                       | Frameshift          |
| Netherlands (2)                          | 2                             | 1614–1615delTCinsG           | p.Y538X                         | Protein truncation  |
| Netherlands (1)<br>USA (1)               | 2                             | c.1444C>T                    | p.R482X                         | Protein truncation  |
| Netherlands (2)                          | 2                             | c.2191C>T                    | p.Q731X                         | Protein truncation  |
| Netherlands (1)<br>Scotland (1)          | 2                             | c.2569_2572delGATT           | p.D857fs                        | Frameshift          |
| Netherlands (2)                          | 2                             | c.2719_2720delGT             | p.V907fs                        | Frameshift          |
| USA (1)<br>Scotland (1)                  | 2                             | c.2731C>T                    | p.R911X                         | Nonsense            |
| Australia (2)                            | 2                             | c.3202C>T                    | p.R1068X                        | Protein truncation  |
| USA (2)                                  | 2                             | c.3439-2A>G                  | N/A                             | Splice site         |
| Ontario (2)                              | 2                             | c.3514_3515insA              | p.R1172fs                       | Frameshift          |
| USA (2)                                  | 2                             | c.3577G>A                    | p.E1193K                        | Missense            |
| Netherlands (2)                          | 2                             | c.3729_3732dupATTA           | p.F1245fs                       | Frameshift          |
| USA (2)                                  | 2                             | c.3768T>G                    | p.Y1256X                        | Nonsense            |
| Netherlands (1)<br>USA (1)               | 2                             | c.3987_3988insGTCA           | p.L1330fs                       | Frameshift          |
| Netherlands (2)                          | 2                             | c.4001G>A                    | p.R1334Q                        | Splice donor defect |
| USA (1)<br>Scotland (1)                  | 2                             | Deletion Exon 5-6            | N/A                             | Large rearrangement |
| Australia (1)                            | 1                             | c. 3725_3737delGTACATTATTTTC | p.R1242fs                       | Frameshift          |
| USA (1)                                  | 1                             | c.10C>T                      | p.Q4X                           | Protein truncation  |
| Netherlands (1)                          | 1                             | c.1190_1191delAT             | p.Y397fs                        | Frameshift          |
| Netherlands (1)                          | 1                             | c.1267delT                   | p.C426fs                        | Frameshift          |
| USA (1)                                  | 1                             | c.1430dupG                   | p.Y478fs                        | Frameshift          |
| Australia (1)                            | 1                             | c.1519_1520insTCCAAGTATGATA  | p.R507fs                        | Frameshift          |
| Netherlands (1)                          | 1                             | c.1615_1616delCT             | p.L539fs                        | Frameshift          |

|                 |   |                                |                        |                              |
|-----------------|---|--------------------------------|------------------------|------------------------------|
| Australia (1)   | 1 | c.1628-1629delAA               | p.K543fs               | Frameshift                   |
| Scotland (1)    | 1 | c.1634_1637delAAGA             | p.K545fs               | Frameshift                   |
| USA (1)         | 1 | c.1637_1638delAG               | p.E546fs               | Frameshift                   |
| Scotland (1)    | 1 | c.1637delAG                    | E546fs                 | Frameshift                   |
| Scotland (1)    | 1 | c.1786T>A<br>c.3724_3726delCGT | p.F596I,<br>p.D1242del | Missense inframe<br>deletion |
| Netherlands (1) | 1 | c.1869delC                     | p.G624fs               | Frameshift                   |
| Scotland (1)    | 1 | c.2061T>A                      | p.C687X                | Protein truncation           |
| USA (1)         | 1 | c.2062_2063delGT               | p.V688fs               | Frameshift                   |
| Australia (1)   | 1 | c.2150_2153delTCAG             | p.V717fs               | Frameshift                   |
| Australia (1)   | 1 | c.2194C>T                      | p.R732X                | Protein truncation           |
| USA (1)         | 1 | c.220G>T                       | p.G74X                 | Nonsense                     |
| Canada (1)      | 1 | c.2504delA                     | p.Q835fs               | Frameshift                   |
| USA (1)         | 1 | c.2690_2691insA                | p.N897fs               | Frameshift                   |
| Australia (1)   | 1 | c.2714T>A                      | p.L905X                | Protein truncation           |
| USA (1)         | 1 | c.3078_3079insT                | p.V1027fs              | Frameshift                   |
| USA (1)         | 1 | c.3155_3156delAG               | p.E1052fs              | Frameshift                   |
| Netherlands (1) | 1 | c.3182delT                     | p.L1061fs              | Frameshift                   |
| Scotland (1)    | 1 | c.3253dupA                     | p.T1085fs              | Frameshift                   |
| Netherlands (1) | 1 | c.3273dupT                     | p.K1092fs              | Frameshift                   |
| Canada (1)      | 1 | c.3312delT                     | p.F1104fs              | Frameshift                   |
| Canada (1)      | 1 | c.3335_3336insATGA             | p.D1112fs              | Frameshift                   |
| USA (1)         | 1 | c.3438+2_3438+3insT            | N/A                    | Aberrant splicing            |
| USA (1)         | 1 | c.3516_3517delAG               | p.R1172fs              | Frameshift                   |
| Scotland (1)    | 1 | c.3516_3527delAGTGTACTAG       | p.R1176del             | Inframe deletion             |
| Scotland (1)    | 1 | c.3518_3519insA                | p.F1174fs              | Frameshift                   |
| Netherlands (1) | 1 | c.3523dupA                     | p.T1175fs              | Frameshift                   |
| USA (1)         | 1 | c.3528_3532delACTTG            | p.R1176fs              | Frameshift                   |
| Australia (1)   | 1 | c.3559_3562delGAAA             | p.E1187fs              | Frameshift                   |
| Australia (1)   | 1 | c.3572-3573insT (c.3573dupT)   | p.V1192fs              | Frameshift                   |
| Netherlands (1) | 1 | c.3772C>T                      | p.Q1258X               | Frameshift                   |
| Scotland (1)    | 1 | c.3799_3800delAT               | p.M1267fs              | Frameshift                   |
| Netherlands (1) | 1 | c.3838C>T                      | p.Q1280X               | Protein truncation           |
| Scotland (1)    | 1 | c.3840_3846delGGAGACT          | p.E1280fs              | Frameshift                   |
| USA (1)         | 1 | c.3850_3851insATTA             | p.T1284fs              | Frameshift                   |
| USA (1)         | 1 | c.3863_3866dupAATT             | p.F1289fs              | Frameshift                   |
| USA (1)         | 1 | c.3920_3923dupATCT             | p.P1309fs              | Frameshift                   |
| Scotland (1)    | 1 | c.3946_3958del13               | p.G1316fs              | Frameshift                   |
| USA (1)         | 1 | c.3956_3959delAAGC             | p.A1320fs              | Frameshift                   |
| Scotland (1)    | 1 | c.3980_3983dupATCA             | p.Q1328fs              | Frameshift                   |

|                 |   |                                 |          |                     |
|-----------------|---|---------------------------------|----------|---------------------|
| Scotland (1)    | 1 | c.644dupT                       | p.V215fs | Frameshift          |
| Netherlands (1) | 1 | c.649-650insT                   | p.D271fs | Frameshift          |
| Netherlands (1) | 1 | c.742C>T                        | p.R248X  | Protein truncation  |
| Scotland (1)    | 1 | c.866_867delGinsAA              | p.G289E  | Missense            |
| Netherlands (1) | 1 | c.del 11 kB promotor area       | N/A      | N/A                 |
| Australia (1)   | 1 | c.del exon 2-6                  | N/A      | Large rearrangement |
| Netherlands (1) | 1 | c.exon 4 Nucleotide Substitutes | N/A      | N/A                 |
| Netherlands (1) | 1 | Deletion exon 3                 | N/A      | Large rearrangement |

\* N/A, not applicable or not known.
